# Supplementary material for: Ensemble machine learning identifies genetic loci associated with future worsening of disability in people with multiple sclerosis
Source: PubMed Central journal article supplement (PMC9652373; doi:10.1038/s41598-022-23685-w), 2022-11-11
Supplement: 41598_2022_23685_MOESM1_ESM.pdf [file 41598_2022_23685_MOESM1_ESM.pdf]

# Web-based Supplementary Material for: *Ensemble machine learning identifies genetic loci associated with future worsening of disability in people with Multiple Sclerosis.*

Valery Fuh-NGWA  
Valeryfuh.ngwa@utas.edu.au

October 10, 2022

## 1 Appendix A1: Imputation of EDSS

```
#####
Bayesian cumulative logit mixed model fitted with JointAI
#####
```

```
## R-Code: For imputation of EDSS
```

```
library(JointAI)
```

```
Call:
```

```
clmm_imp(fixed = edss ~ sex + age + ebv + bmi + smoker + hads +
  edssprev_2 + edssprev_3 + edssprev_4 + edssprev_5 + edssprev_6 +
  edssprev_7 + edssprev_8, data = msdat, random = ~1 | id,
  n.chains = 3, n.adapt = 5000, n.iter = 10000, thin = 5,
  monitor_params = c(imps = TRUE, analysis_main = TRUE),
  auxvars = ~latexp + vitd + mstype,
  refcats = "first")
```

Posterior summary:

|             | Mean    | SD      | 2.5%     | 97.5%   | P-value | GR-crit | MCE/SD |
|-------------|---------|---------|----------|---------|---------|---------|--------|
| sex[Female] | -0.1586 | 0.20404 | -0.55150 | 0.2401  | 0.429   | 1.02    | 0.0541 |
| EBNA        | 0.1526  | 0.14254 | -0.12336 | 0.4328  | 0.278   | 1.00    | 0.0147 |
| Age         | 0.0583  | 0.00735 | 0.04415  | 0.0729  | 0.000   | 1.01    | 0.0246 |
| BMI         | 0.0174  | 0.01236 | -0.00734 | 0.0418  | 0.157   | 1.00    | 0.0221 |
| smoker[Yes] | -0.0786 | 0.17188 | -0.41429 | 0.2655  | 0.638   | 1.00    | 0.0279 |
| hads        | 0.0699  | 0.01072 | 0.04896  | 0.0911  | 0.000   | 1.00    | 0.0205 |
| edssprev_2  | 1.1323  | 0.12402 | 0.89331  | 1.3775  | 0.000   | 1.00    | 0.0163 |
| edssprev_3  | 0.9975  | 0.12923 | 0.74124  | 1.2467  | 0.000   | 1.01    | 0.0177 |
| edssprev_4  | 1.3569  | 0.12474 | 1.11373  | 1.6023  | 0.000   | 1.00    | 0.0190 |
| edssprev_5  | 2.5623  | 0.19161 | 2.18753  | 2.9399  | 0.000   | 1.00    | 0.0173 |
| edssprev_6  | 4.6562  | 0.29057 | 4.10134  | 5.2345  | 0.000   | 1.00    | 0.0195 |
| edssprev_7  | 4.8539  | 1.16908 | 2.49932  | 7.1638  | 0.000   | 1.00    | 0.0161 |
| edssprev_8  | 9.8487  | 1.20807 | 7.56750  | 12.3206 | 0.000   | 1.00    | 0.0142 |

Posterior summary of the intercepts:

|          | Mean   | SD    | 2.5%   | 97.5%  | tail-prob. | GR-crit | MCE/SD |
|----------|--------|-------|--------|--------|------------|---------|--------|
| edss > 1 | 0.612  | 0.223 | 0.171  | 1.047  | 0.00567    | 1.02    | 0.0547 |
| edss > 2 | -0.553 | 0.223 | -0.991 | -0.121 | 0.01100    | 1.03    | 0.0517 |
| edss > 3 | -1.562 | 0.225 | -2.006 | -1.128 | 0.00000    | 1.03    | 0.0516 |
| edss > 4 | -3.444 | 0.236 | -3.925 | -2.989 | 0.00000    | 1.03    | 0.0407 |

```

edss > 5  -5.084 0.258  -5.599 -4.592    0.00000    1.02 0.0439
edss > 6  -9.978 0.447 -10.854 -9.114    0.00000    1.01 0.0262
edss > 7 -11.044 0.555 -12.177 -9.983    0.00000    1.01 0.0237

```

Posterior summary of random effects covariance matrix:

|                | Mean | SD    | 2.5%  | 97.5% | tail-prob. | GR-crit | MCE/SD |
|----------------|------|-------|-------|-------|------------|---------|--------|
| D_edss_id[1,1] | 1.32 | 0.239 | 0.909 | 1.84  |            | 1       | 0.022  |

MCMC settings:  
Iterations = 5005:15000  
Sample size per chain = 2000  
Thinning interval = 5  
Number of chains = 3

Number of observations: 3065  
Number of groups:  
- id: 279

## 2 Appendix A2: Assessing the quality of the Imputation model

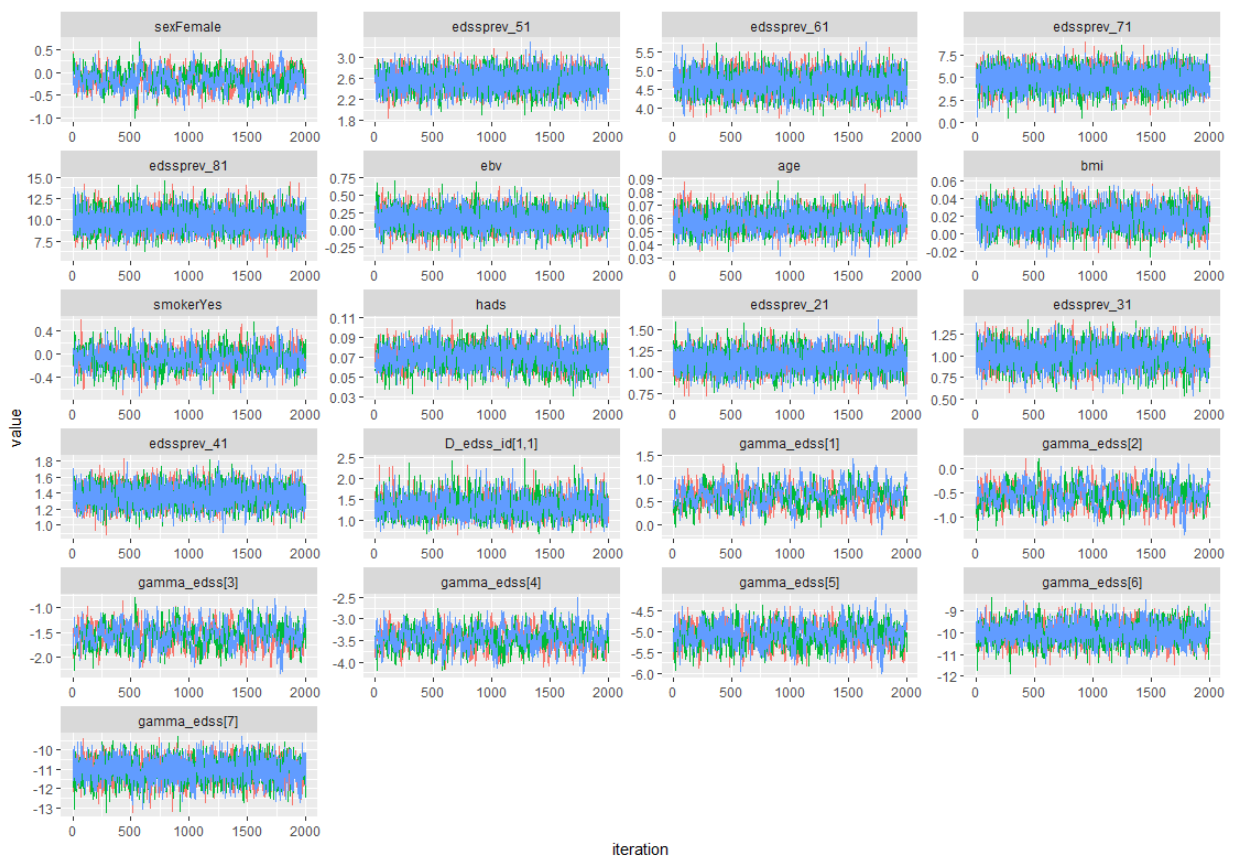

Figure 1: A trace plot of the main analysis variables indicating a good mixing rate of the Markov Chains

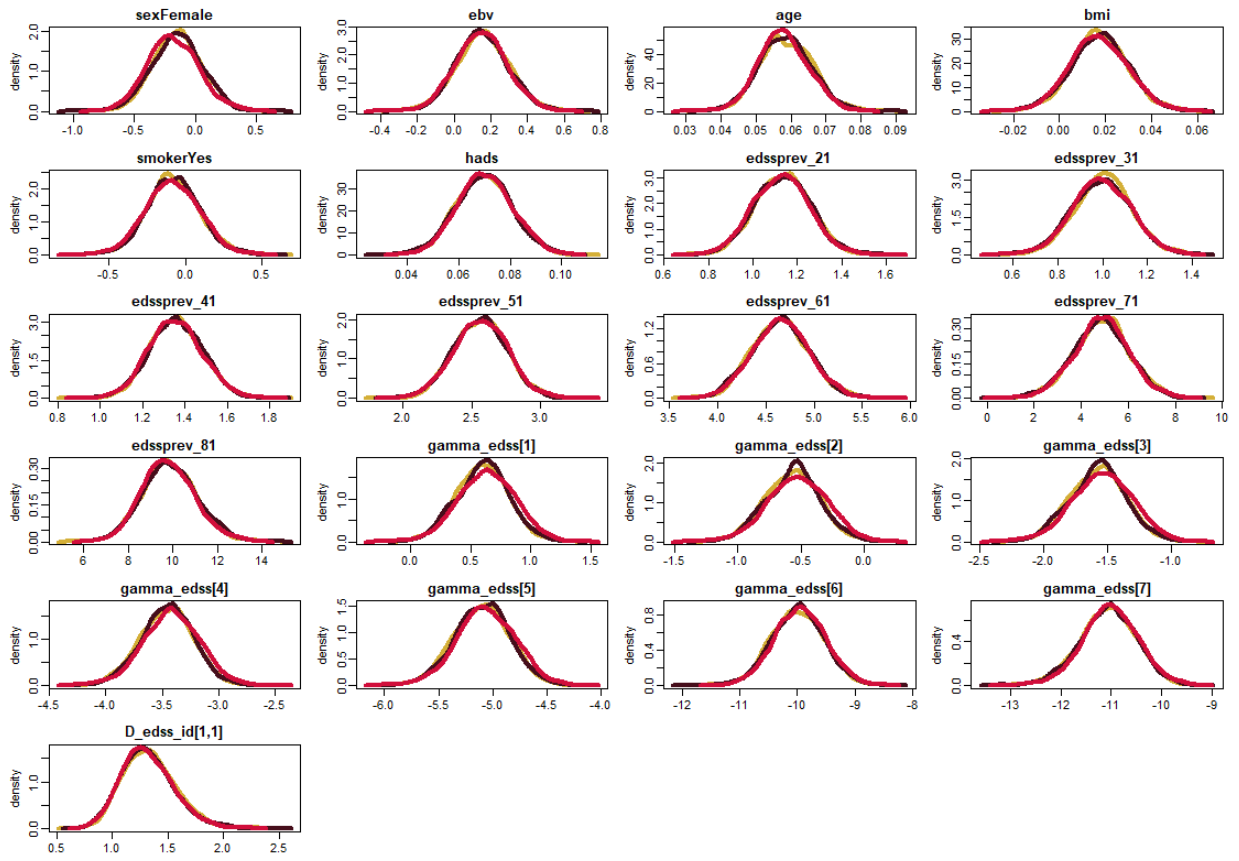

Figure 2: A density plot of main analysis variables showing satisfaction of the normality assumption for the regression parameters

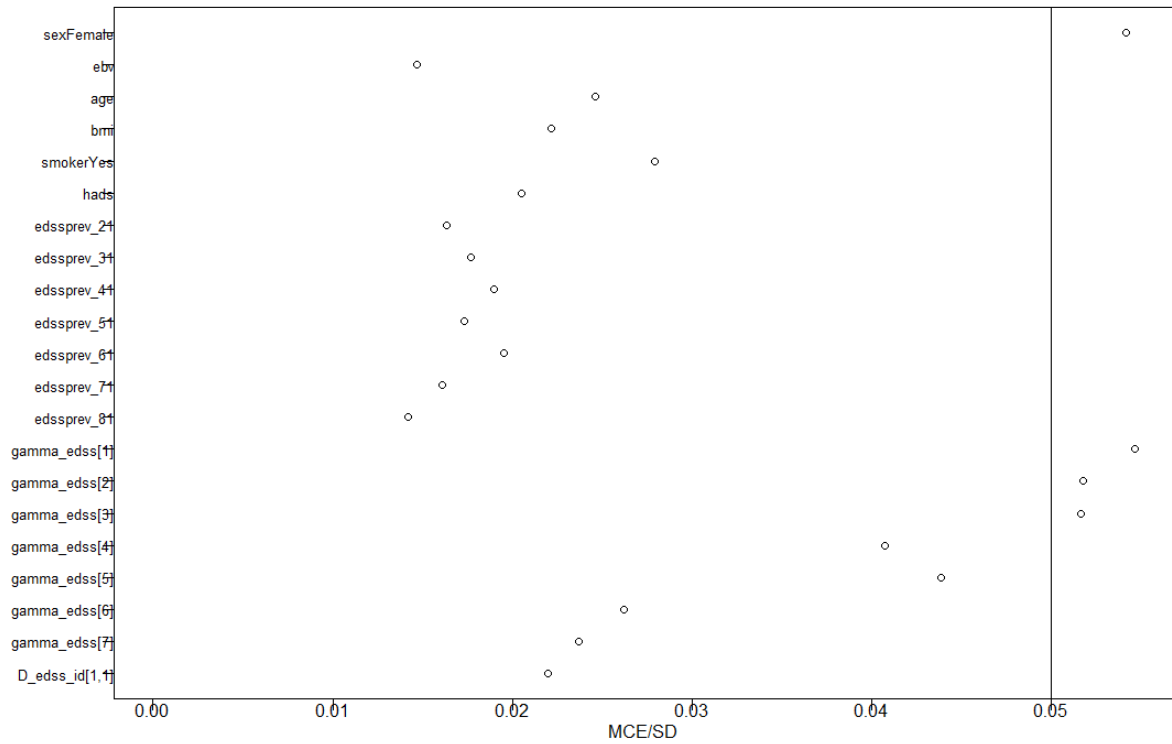

Figure 3: Monte Carlo standard errors for most parameters are below the 5% margin

### 3 Appendix B: Functional Analysis of the identified Associations

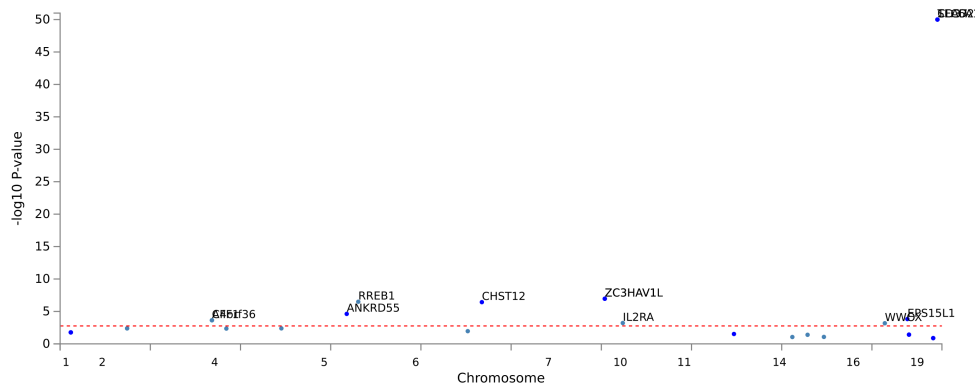

Figure 4: A manhattan plot of the gene-based test computed by MAGMA using SNP-outcome association summary statistics. Input SNPs were mapped to 13 protein coding genes. Genome wide significance (red dashed line in the plot) was defined at  $P = -\log_{10}(0.05/28) = 2.748188$

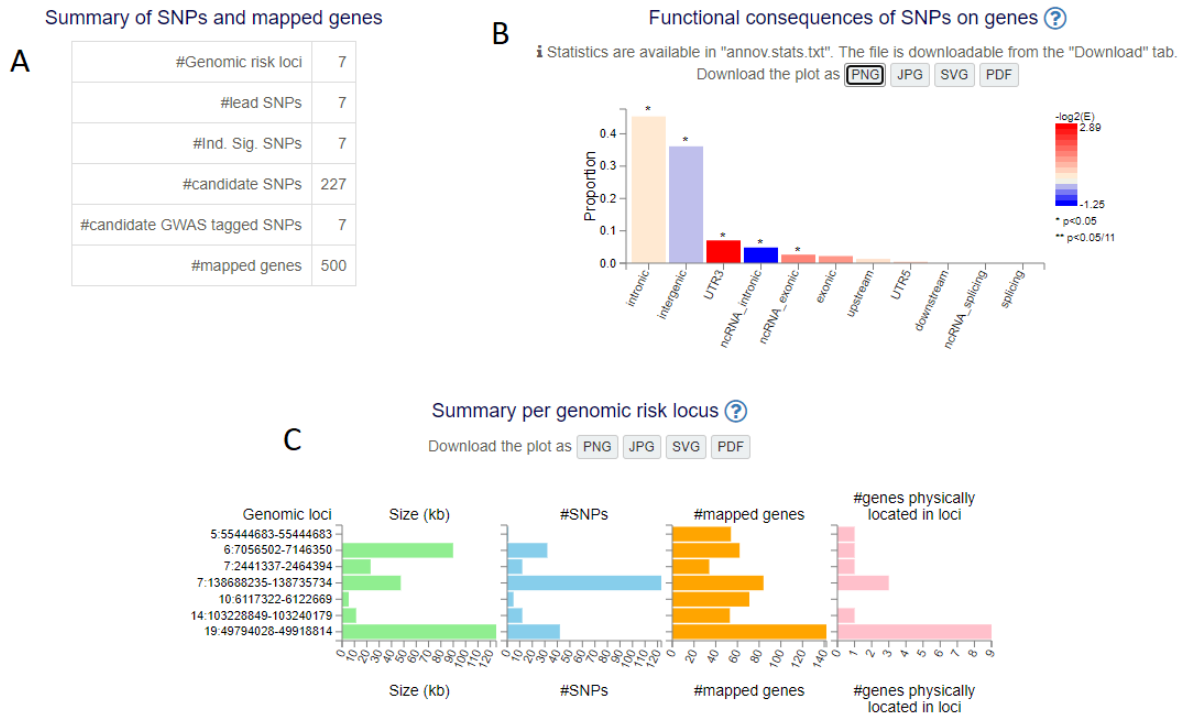

Figure 5: Functional NSP mapping and gene enrichment analysis. **Panel A:** Summary of independent lead SNPs and mapped genes. **Panel B:** Functional consequences of lead SNPs on genes. The histogram displays the proportion of SNPs (all SNPs in LD of independent significant SNPs) which have corresponding functional annotation assigned by ANNOVAR. Bars are colored by  $\log_2(\text{enrichment})$  relative to all SNPs selected in the reference panel. **Panel C:** Total number of SNPs per genomic locus. The histograms displays summary results per genomic locus. Note that the genomic loci can contain more than 1 independent SNPs

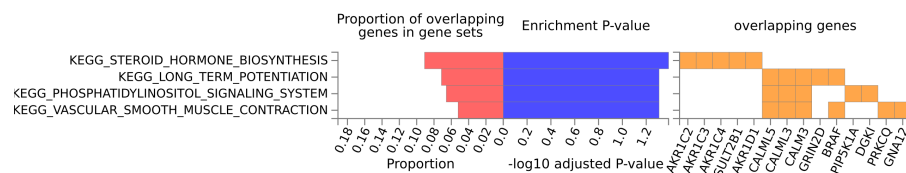

Figure 6: Functional enrichment of input genes in Gene Sets using the Kyoto Encyclopedia of Genes and Genomes (KEGG). Shown are the pathways/targets in which the enriched genes are involved

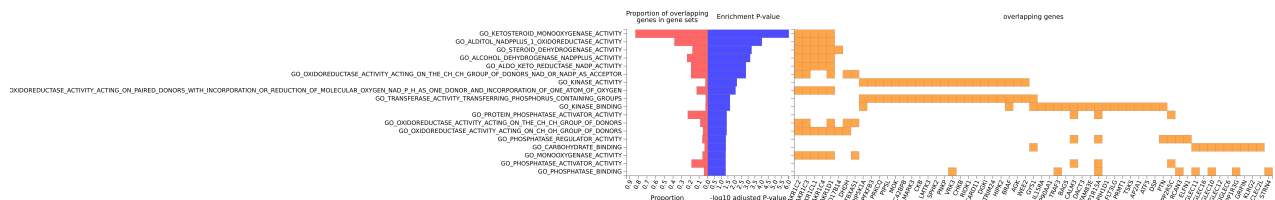

Figure 7: Functional enrichment of input genes in Gene Sets according to Molecular Function. This defines the molecular processes in which the enriched genes are involved.

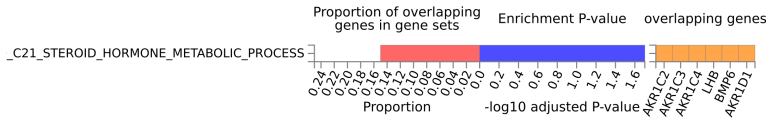

Figure 8: Functional enrichment of input genes in Gene Sets showing the biological processes in which the enriched genes are involved.

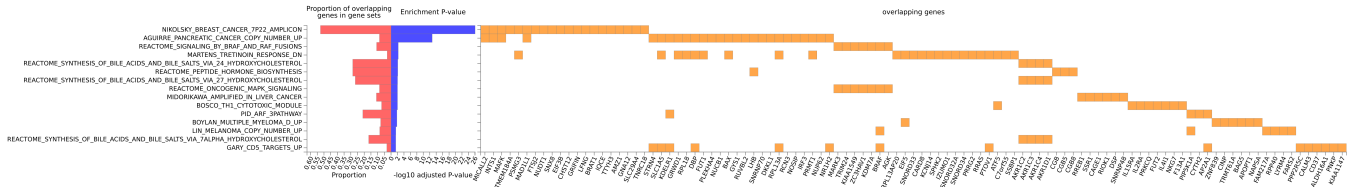

Figure 9: Functional enrichment of input genes using curated Gene Sets. These shows functions and pathways of the enriched genes based on curated gene sets from public databases

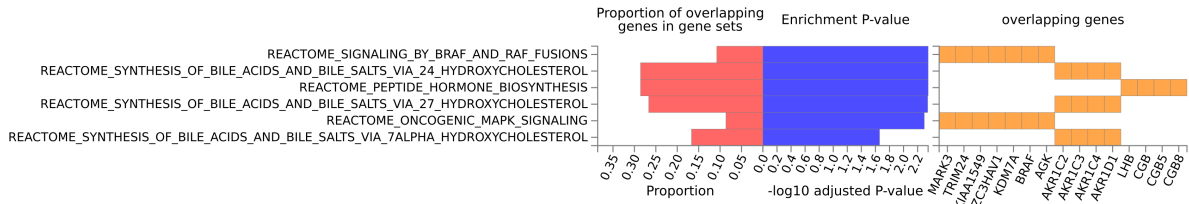

Figure 10: Functional enrichment of input genes in Gene Sets using the Reactome database. Functional consequence of the enriched genes were extracted from the reactome database.

## 4 Appendix C1: Assessing the predictive behavior of ensembles genetic prognostic models in predicting future worsening outcomes in MS over time

Table 1: Variable Selection, Training, and Validation of Ensemble Genetic Classifiers for the prediction of MS disability worsening over time

| Selection Model               | Prediction Model | Area under receiver operating characteristic curve (AUC) and Positive predictive value (PPV) |                                                |                                                |                                                |
|-------------------------------|------------------|----------------------------------------------------------------------------------------------|------------------------------------------------|------------------------------------------------|------------------------------------------------|
|                               |                  | Visits: 1→4                                                                                  | Visits: 1→7                                    | Visits: 1→10                                   | Visits: 1→12                                   |
|                               |                  | DD≤5year<br>$N_{subj}=45$ ;<br>$N_{obs}=215$                                                 | DD≤10years<br>$N_{subj}=55$ ;<br>$N_{obs}=285$ | DD≤15years<br>$N_{subj}=60$ ;<br>$N_{obs}=375$ | DD≤20years<br>$N_{subj}=67$ ;<br>$N_{obs}=415$ |
| <b>LASSO</b><br>(#SNPs = 141) | MEgbm            | 0.79(0.72, 0.87)                                                                             | 0.72(0.66, 0.77)                               | 0.67(0.62, 0.72)                               | 0.67(0.62, 0.72)                               |
|                               |                  | 0.92(0.85, 0.99)                                                                             | 0.86(0.81, 0.92)                               | 0.79(0.74, 0.84)                               | 0.78(0.73, 0.82)                               |
|                               | MErf             | 0.81(0.74, 0.88)                                                                             | 0.68(0.62, 0.74)                               | 0.64(0.59, 0.70)                               | 0.64(0.59, 0.69)                               |
|                               |                  | 0.88(0.81, 0.95)                                                                             | 0.85(0.79, 0.90)                               | 0.80(0.76, 0.85)                               | 0.79(0.75, 0.84)                               |
| GBM                           | 0.51(0.41, 0.60) | 0.53(0.47, 0.60)                                                                             | 0.51(0.46, 0.57)                               | 0.52(0.47, 0.58)                               |                                                |
|                               | 0.64(0.56, 0.72) | 0.67(0.61, 0.72)                                                                             | 0.60(0.55, 0.65)                               | 0.57(0.52, 0.61)                               |                                                |
| RF                            | 0.50(0.41, 0.59) | 0.53(0.46, 0.60)                                                                             | 0.52(0.46, 0.57)                               | 0.52(0.47, 0.58)                               |                                                |
|                               | 0.60(0.52, 0.68) | 0.67(0.61, 0.72)                                                                             | 0.58(0.63, 0.63)                               | 0.59(0.54, 0.63)                               |                                                |
| <b>EN</b><br>(#SNPs=150)      | MEgbm            | 0.78(0.71, 0.86)                                                                             | 0.69(0.63, 0.75)                               | 0.65(0.59, 0.70)                               | 0.64(0.59, 0.69)                               |
|                               |                  | 0.90(0.83, 0.97)                                                                             | 0.84(0.79, 0.90)                               | 0.79(0.75, 0.84)                               | 0.78(0.73, 0.83)                               |
|                               | MErf             | 0.82(0.76, 0.89)                                                                             | 0.69(0.63, 0.74)                               | 0.65(0.60, 0.70)                               | 0.65(0.60, 0.70)                               |
|                               |                  | 0.92(0.85, 0.99)                                                                             | 0.56(0.80, 0.91)                               | 0.84(0.79, 0.88)                               | 0.83(0.78, 0.89)                               |
| GBM                           | 0.53(0.43, 0.62) | 0.54(0.47, 0.62)                                                                             | 0.52(0.45, 0.58)                               | 0.53(0.48, 0.59)                               |                                                |
|                               | 0.62(0.54, 0.70) | 0.61(0.55, 0.66)                                                                             | 0.57(0.52, 0.62)                               | 0.57(0.52, 0.62)                               |                                                |
| RF                            | 0.52(0.42, 0.61) | 0.53(0.47, 0.60)                                                                             | 0.52(0.47, 0.58)                               | 0.53(0.47, 0.59)                               |                                                |
|                               | 0.61(0.53, 0.69) | 0.60(0.55, 0.66)                                                                             | 0.58(0.53, 0.63)                               | 0.58(0.53, 0.63)                               |                                                |
| <b>NNG-SIS</b><br>(#SNPs=130) | MEgbm            | 0.83(0.76, 0.89)                                                                             | 0.73(0.68, 0.79)                               | 0.69(0.64, 0.74)                               | 0.68(0.63, 0.73)                               |
|                               |                  | 0.91(0.84, 0.97)                                                                             | 0.83(0.78, 0.88)                               | 0.79(0.75, 0.84)                               | 0.78(0.73, 0.83)                               |
|                               | MErf             | 0.82(0.76, 0.89)                                                                             | 0.69(0.63, 0.75)                               | 0.65(0.60, 0.70)                               | 0.65(0.60, 0.70)                               |
|                               |                  | 0.93(0.86, 1.00)                                                                             | 0.92(0.86, 0.97)                               | 0.86(0.82, 0.91)                               | 0.87(0.82, 0.91)                               |
| GBM                           | 0.50(0.41, 0.60) | 0.52(0.45, 0.58)                                                                             | 0.51(0.46, 0.57)                               | 0.52(0.46, 0.57)                               |                                                |
|                               | 0.60(0.51, 0.68) | 0.61(0.56, 0.67)                                                                             | 0.57(0.52, 0.62)                               | 0.58(0.53, 0.62)                               |                                                |
| RF                            | 0.53(0.43, 0.62) | 0.50(0.44, 0.57)                                                                             | 0.50, 0.45, 0.56                               | 0.50(0.45, 0.56)                               |                                                |
|                               | 0.58(0.50, 0.66) | 0.60(0.54, 0.65)                                                                             | 0.57(0.52, 0.61)                               | 0.56(0.51, 0.61)                               |                                                |

AUC: unshaded values.

PPV: shaded values.

DD: Disease duration

Values in brackets are the 95% C.I.

#SNPs: Total number of SNPs selected.

## 5 Appendix C2: Assessing the dynamic predictive behavior of the final ensemble with 28 prognostic variants

Table 2: Training and Validation of ensemble genetic models using 28 candidate risk variants. Time-dynamic AUC and 95% C.I are shown. MEgmbm and MERf had the highest sensitivities, and are best suited for predicting worsening outcomes over time.

| (a) GBM |                  |                  | (b) RF |                  |                  |
|---------|------------------|------------------|--------|------------------|------------------|
| Visits  | Train AUC(C.I)   | Test AUC(C.I)    | Visits | Train AUC(C.I)   | Test AUC(C.I)    |
| 1       | 0.59(0.49, 0.69) | 0.56(0.48, 0.78) | 1      | 0.89(0.83, 0.95) | 0.66(0.41, 0.91) |
| 2       | 0.57(0.47, 0.66) | 0.61(0.46, 0.77) | 2      | 0.86(0.80, 0.92) | 0.55(0.39, 0.71) |
| 3       | 0.54(0.45, 0.64) | 0.73(0.58, 0.88) | 3      | 0.88(0.83, 0.93) | 0.67(0.52, 0.83) |
| 4       | 0.52(0.42, 0.62) | 0.60(0.44, 0.76) | 4      | 0.88(0.82, 0.93) | 0.54(0.37, 0.70) |
| 5       | 0.52(0.42, 0.62) | 0.50(0.33, 0.67) | 5      | 0.82(0.75, 0.89) | 0.56(0.39, 0.74) |
| 6       | 0.56(0.45, 0.66) | 0.50(0.28, 0.72) | 6      | 0.88(0.81, 0.94) | 0.60(0.40, 0.80) |
| 7       | 0.61(0.50, 0.73) | 0.57(0.33, 0.81) | 7      | 0.71(0.61, 0.81) | 0.62(0.38, 0.87) |
| 8       | 0.51(0.38, 0.65) | 0.59(0.38, 0.81) | 8      | 0.60(0.46, 0.73) | 0.54(0.31, 0.76) |
| 9       | 0.51(0.36, 0.66) | 0.60(0.40, 0.79) | 9      | 0.64(0.49, 0.79) | 0.52(0.31, 0.73) |
| 10      | 0.61(0.42, 0.80) | 0.78(0.54, 1.01) | 10     | 0.68(0.48, 0.89) | 0.63(0.37, 0.89) |

  

| (c) MEgmbm |                  |                  | (d) MERf |                  |                  |
|------------|------------------|------------------|----------|------------------|------------------|
| Visits     | Train AUC(C.I)   | Test AUC(C.I)    | Visits   | Train AUC(C.I)   | Test AUC(C.I)    |
| 1          | 0.86(0.80, 0.92) | 0.95(0.89, 1.02) | 1        | 0.99(0.98, 1.00) | 0.65(0.37, 0.93) |
| 2          | 0.93(0.88, 0.97) | 0.92(0.83, 1.00) | 2        | 0.99(0.98, 1.00) | 0.87(0.78, 0.97) |
| 3          | 0.92(0.87, 0.96) | 0.89(0.80, 0.97) | 3        | 0.99(0.98, 1.00) | 0.63(0.47, 0.79) |
| 4          | 0.92(0.88, 0.97) | 0.93(0.87, 1.00) | 4        | 0.98(0.97, 1.00) | 0.72(0.57, 0.86) |
| 5          | 0.89(0.83, 0.94) | 0.97(0.92, 1.02) | 5        | 0.98(0.95, 1.00) | 0.69(0.54, 0.84) |
| 6          | 0.86(0.79, 0.92) | 0.72(0.53, 0.90) | 6        | 0.97(0.94, 1.00) | 0.55(0.32, 0.77) |
| 7          | 0.81(0.73, 0.90) | 0.93(0.84, 1.02) | 7        | 0.92(0.85, 0.98) | 0.82(0.66, 0.97) |
| 8          | 0.84(0.73, 0.94) | 0.97(0.90, 1.03) | 8        | 0.88(0.80, 0.96) | 0.68(0.48, 0.89) |
| 9          | 0.88(0.79, 0.96) | 0.91(0.82, 1.01) | 9        | 0.92(0.85, 0.99) | 0.65(0.46, 0.84) |
| 10         | 0.90(0.79, 1.01) | 0.86(0.70, 1.03) | 10       | 0.93(0.85, 1.00) | 0.67(0.41, 0.93) |



## 6 Fixed effects estimates of the final ensemble prognostic model on the original dataset without EDSS imputation

Table 3: Multivariable mixed-effects Cox model on original data (without imputation of EDSS) using 28 candidate genetic variants. These results are quite similar to those on Table 2 of the article.

| <i>SNP</i>                     | <i>CHR</i> | <i>POS</i> | <i>Alleles</i> | <i>P-value</i> | <i>HR</i> | <i>beta</i> | <i>SE</i> |
|--------------------------------|------------|------------|----------------|----------------|-----------|-------------|-----------|
| <i>rs12722559</i> <sup>7</sup> | 10         | 64449549   | G/T            | 1.20E-04       | 0.94      | -0.07       | 0.02      |
| <i>rs4808760</i>               | 10         | 6070273    | C/A            | 6.10E-04       | 0.91      | -0.11       | 0.03      |
| <i>rs9277626</i>               | 19         | 18301979   | G/C            | 3.80E-02       | 0.92      | -0.07       | 0.03      |
| <i>rs12434551</i>              | 6          | 33081823   | G/A            | 2.20E-03       | 0.93      | -0.07       | 0.02      |
| <i>rs7260482</i>               | 14         | 69253364   | A/T            | 4.00E-02       | 1.06      | 0.07        | 0.03      |
| <i>rs12588969</i>              | 19         | 45143942   | A/C            | 1.30E-01       | 0.91      | -0.1        | 0.06      |
| <i>rs6032662</i>               | 14         | 103230758  | C/G            | 2.10E-10       | 1.11      | 0.09        | 0.01      |
| <i>rs11256593</i>              | 20         | 44734310   | C/T            | 9.30E-02       | 1.10      | 0.1         | 0.06      |
| <i>rs802730</i>                | 10         | 6117322    | T/C            | 5.10E-57       | 1.13      | 0.12        | 0.01      |
| <i>rs962052</i>                | 6          | 128280104  | T/C            | 1.10E-02       | 1.06      | 0.06        | 0.02      |
| <i>rs1465697</i>               | 2          | 151644203  | C/T            | 9.70E-02       | 1.06      | 0.07        | 0.04      |
| <i>rs2590438</i>               | 19         | 49837246   | C/T            | 1.70E-128      | 1.09      | 0.09        | 0.00      |
| <i>rs1801133</i>               | 3          | 187565968  | T/G            | 3.60E-03       | 1.10      | 0.09        | 0.03      |
| <i>rs11852059</i>              | 1          | 11856378   | A/G            | 1.70E-02       | 0.94      | -0.06       | 0.03      |
| <i>rs531612</i>                | 14         | 52306091   | A/C            | 8.80E-02       | 0.93      | -0.07       | 0.04      |
| <i>rs12925972</i>              | 11         | 65705432   | C/T            | 3.00E-02       | 1.06      | 0.08        | 0.04      |
| <i>rs1177228</i>               | 16         | 79111297   | C/T            | 6.60E-04       | 1.08      | 0.09        | 0.03      |
| <i>rs2286974</i>               | 2          | 61242410   | G/A            | 4.10E-03       | 1.09      | 0.09        | 0.03      |
| <i>rs2705616</i>               | 16         | 11114512   | G/A            | 8.50E-02       | 1.11      | 0.11        | 0.06      |
| <i>rs58166386</i>              | 4          | 87862396   | G/C            | 2.30E-04       | 0.87      | -0.11       | 0.03      |
| <i>rs10271373</i>              | 19         | 16559421   | G/A            | 1.50E-04       | 1.08      | 0.08        | 0.02      |
| <i>rs72989863</i>              | 7          | 138729795  | C/A            | 1.10E-07       | 0.91      | -0.1        | 0.02      |
| <i>rs55858457</i> <sup>5</sup> | 4          | 164493807  | G/A            | 4.10E-03       | 1.07      | 0.07        | 0.02      |
| <i>rs12211604</i>              | 7          | 2443302    | G/T            | 3.70E-07       | 0.93      | -0.07       | 0.01      |
| <i>rs6533052</i> <sup>3</sup>  | 6          | 7100029    | A/G            | 3.20E-07       | 1.16      | 0.15        | 0.03      |
| <i>rs7731626</i> <sup>2</sup>  | 4          | 103911781  | A/G            | 4.40E-03       | 0.96      | -0.05       | 0.02      |
| <i>rs6589939</i> <sup>4</sup>  | 5          | 55444683   | G/A            | 2.40E-05       | 0.93      | -0.08       | 0.02      |
